# Supplementary material
Source: PubMed Central journal article supplement (PMC3129740)

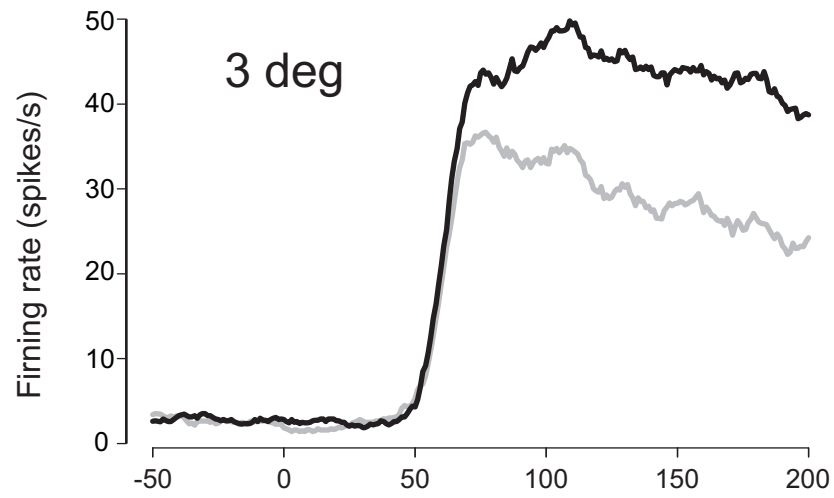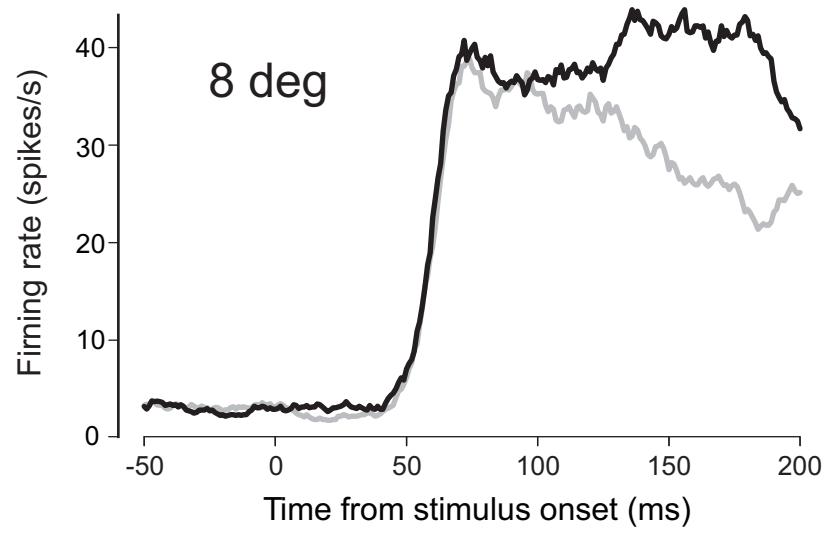

Supplement: supp_00928.2010_figS1.pdf [file supp_00928.2010_figS1.pdf]
